# Supplementary material for: Bimetallic Ni2−xCoxP carbon nanofibers network: solid–solution alloy nano-architecture as efficient electrocatalyst for water splitting
Source: Royal Society of Chemistry journal article supplement (doi:10.1039/d4gc01098a), 2024-01-01
Supplement: d4gc01098a1.pdf [file d4gc01098a1.pdf]

## Supporting Information

### **Bimetallic Ni<sub>2-x</sub>Co<sub>x</sub>P carbon nanofibers network: Solid-Solution-Alloy nano-architecture as efficient electrocatalysts for water splitting**

Meijie Ding<sup>a</sup>, Zhiqiang Wei<sup>a,b\*</sup>, Wenhua Zhao<sup>b</sup>, Qiang Lu<sup>c</sup>, Chenggong Lu<sup>b</sup>, Meipan Zhou<sup>a,b</sup>, Dexue Liu<sup>a\*\*</sup>, Hua Yang<sup>a,b</sup>

<sup>a</sup> State Key Laboratory of Advanced Processing and Recycling of Non-ferrous Metals, Lanzhou University of Technology, Lanzhou 730050, China

<sup>b</sup> School of Science, Lanzhou University of Technology, Lanzhou, 730050, China

<sup>c</sup> School of Materials Science and Engineering, Beihang University, Beijing, 100000, China

\* Corresponding Author e-mail: [qianweizuo@163.com](mailto:qianweizuo@163.com);

\*\* Corresponding Author e-mail: [dxliu@lut.edu.cn](mailto:dxliu@lut.edu.cn)

#### **1. Experimental Section**

##### **1.1. materials**

All chemical reagents were used from commercial sources without further purification, and these materials include: Nickel nitrate hexahydrate (Ni(NO<sub>3</sub>)<sub>2</sub>·6H<sub>2</sub>O, Aladdin), Cobalt nitrate hexahydrate (Co(NO<sub>3</sub>)<sub>2</sub>·6H<sub>2</sub>O, Aladdin), Phosphorus red (P<sub>4</sub>, Aladdin), absolute ethanol (C<sub>2</sub>H<sub>5</sub>OH, Aladdin) Potassium hydroxide (KOH, Aladdin), Polyvinylpyrrolidone ((C<sub>6</sub>H<sub>9</sub>No)<sub>n</sub>, Aladdin), N, N-dimethylformamide (DMF, Aladdin), Ni foam (1×2 cm<sup>2</sup>), Nafion solution (D-520 nafion solutions, Sigma-Aldrich) and ultrapure water (> 18 MΩ cm<sup>-1</sup>).

##### **1.2. Synthesis of sample**

In this section, the synthesis of Ni<sub>2-x</sub>Co<sub>x</sub>P/CNFs precursor and Ni<sub>2-x</sub>Co<sub>x</sub>P/CNFs will be introduced in detail, and the synthesis process of the two materials can be seen in Scheme 1.

Typically, a varied amount of Co(NO<sub>3</sub>)<sub>2</sub>·6H<sub>2</sub>O and Ni(NO<sub>3</sub>)<sub>2</sub>·6H<sub>2</sub>O were dissolved into the mixed solvent consisting of 3 mL N, N-dimethylformamide, 1 mL deionized water, and 2 mL alcohol by stirring for 30 min to form a homogeneous solution, in which the offering molar ratio of metal cobalt to metal nickel was maintained at the level of 1:2, 1:1, 2:1, respectively, and further 1.8 g Polyvinylpyrrolidone was added into the forming homogeneous solution. After it was continuously stirred for 24 hours, the resulting mixture was transferred to an injection in an electrospinning device with aluminum foil as a nanofiber collector, and with the condition that the syringe speed was set to 0.25 mL h<sup>-1</sup>, the distance between the aluminum foil and needle was 18 cm, and the positive high voltage to the electrospinning was 16.8 kV. The synthetic nanofiber membranes could be readily torn down from the aluminum foil, and the collected membranes were dried at 60 °C in a vacuum oven for 24 hours before the

subsequent chemical reactions. Afterwards, the dried products were first stabilized at 150 °C for 6 hours at speed of 1 °C min<sup>-1</sup> in the tube furnace under Ar flow, and then heated to 350 °C at 1 °C min<sup>-1</sup> and kept for 2 hours. Finally, the temperature zone was heated to 550 °C at 1 °C min<sup>-1</sup> and maintained for 4 hours. When the reaction was cooled to room temperature, the Ni<sub>2-x</sub>Co<sub>x</sub>P/CNFs precursor sample was acquired in the alumina boat.

The Ni<sub>2-x</sub>Co<sub>x</sub>P/CNFs was obtained by a familiar vapor-phase phosphatization technology, in which 0.2 g of the sample and 1 g of red P were placed at two separate positions in a porcelain boat. Subsequently, the tube furnace was calcined at 650 °C for 2 hours with a heating rate of 1 °C min<sup>-1</sup> in Ar atmosphere, and the loadings of Ni<sub>2-x</sub>Co<sub>x</sub>P/CNFs is about 1 g.

### 1.3. Physical measurements

The microstructure of the as-synthesized samples was determined by both the scanning electron microscope (SEM, JSM-6701F) and the transmission electron microscope (TEM, JEM 2100F), respectively. The products were determined by using an X-ray diffractometer (XRD, TK-XRD-201) with Cu K $\alpha$  radiation in the 2 $\theta$  range of from 10° to 90°. The surface element chemical state was characterized by X-ray photoelectron spectroscopy (XPS, Axis Ultra DLD). Raman measurements were obtained on a Raman microspectrometer (Horiba Jobin Yvon), with a laser wavelength of 633 nm. N<sub>2</sub> adsorption/desorption isotherms were performed at 7 K using a Surface Area Analyzer (JW-BK200B).

### 1.4. Electrochemical Measurements.

All electrochemical tests were recorded in 1 M KOH electrolyte using the CS310M electrochemical testing system. On a standard three-electrode configuration, Hg/HgO electrode and graphite rod were used as reference and counter electrodes, respectively. The third electrode can be fabricated by the following method: 4 mg of Ni<sub>2-x</sub>Co<sub>x</sub>P/CNFs and 40  $\mu$ L of Nafion solution (5%) were dispersed in a 1 mL solvent mixture of water/ethanol (volume ratio = 7:3) simultaneously. The homogeneous ink was obtained after ultrasonication for 1 hour, and then the above 200  $\mu$ L as-prepared ink, its mass loading of the sample being 0.8 mg cm<sup>-2</sup>, was added dropwise on a Ni foam as the work electrode. All potentials reported in our manuscript were evaluated versus the reversible hydrogen electrode (RHE) by the formula of  $E_{RHE} = E_{Hg/HgO} + (0.098 + 0.0591 \times \text{pH}) \text{ V}$ . The polarization curves (2 mV s<sup>-1</sup>) were recorded in 1 M KOH solution, the stability measurements were obtained by chronopotentiometry test for 24 hours, and the electrochemical impedance spectroscopy (EIS) was conducted from 10<sup>-2</sup> to 10<sup>6</sup> Hz at a given potential (-0.106 V vs RHE). To evaluate the effective active electrode surface area, different scanning rates (20-200 mV s<sup>-1</sup>) of cyclic voltammetry (CV) cycling were performed to calculate the double-layer capacitance (Cdl). All polarization curves are obtained by iR-corrections.

### 1.5. Computational methodology

All theoretical running program were obtained using first-principles, and carried out by the Vienna ab initio simulation package (VASP) program. The electron/ions exchange and correlation are described by using the functional of Perdew–Burke–Ernzerhof (PBE) with generalized gradient approximation (GGA) and the structures are relaxed using the conjugate gradient algorithm as implemented in VASP code until the forces and total energy on all atoms are converged to less than  $0.01 \text{ eV \AA}^{-1}$  and  $1 \times 10^{-5} \text{ eV}$ . To optimize design model, the plane-wave cut-off energy is set at 500 eV and a  $3 \times 3 \times 1$  Monkhorst-Pack k-point sampling is used to obtained the Brillouin zone integration in this work. The final DFT model conform to the real structure of the real active.

The free energy is calculated by the following formula:

$$G=E+ZPE-TS \quad (1)$$

Where G is the free energy, E is the total energy from the DFT, ZPE is the zero point energy and TS is the entropy contribution (T values was 300 k).

The ZPE was obtained according to the following for mula:

$$ZPE = \sum hv \quad (2)$$

And the TS values are calculated after gaining the zero point energy according to the following formula:

$$TSv = kBT [ \sum K \ln(1 - e^{-hv/kBT}) + \sum K hv/kBT (e^{-hv/kBT} - 1) + 1 ] \quad (3)$$

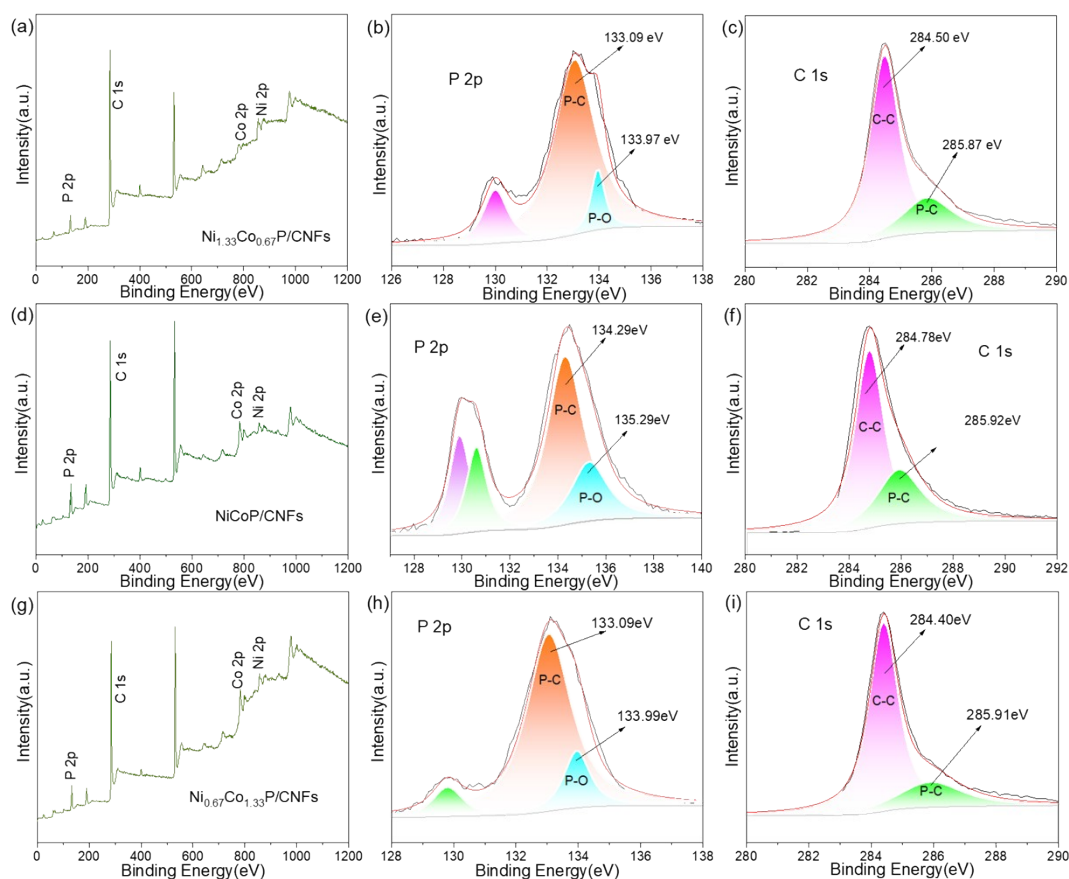

**Figure S1.** (a) XPS full spectrum of  $\text{Ni}_{1.33}\text{Co}_{0.67}\text{P}/\text{CNFs}$ . (b, c) High-resolution XPS spectra of P 2p and C 1s of  $\text{Ni}_{1.33}\text{Co}_{0.67}\text{P}/\text{CNFs}$  samples, respectively. (d) XPS full spectrum of  $\text{Ni}_{1.33}\text{Co}_{0.67}\text{P}/\text{CNFs}$ . (e, f) High-resolution XPS spectra of P 2p and C 1s of  $\text{NiCoP}/\text{CNFs}$  samples, respectively. (g) XPS full spectrum of  $\text{Ni}_{0.67}\text{Co}_{1.33}\text{P}/\text{CNFs}$ . (h, i) High-resolution XPS spectra of P 2p and C 1s of  $\text{Ni}_{0.67}\text{Co}_{1.33}\text{P}/\text{CNFs}$  samples, respectively.

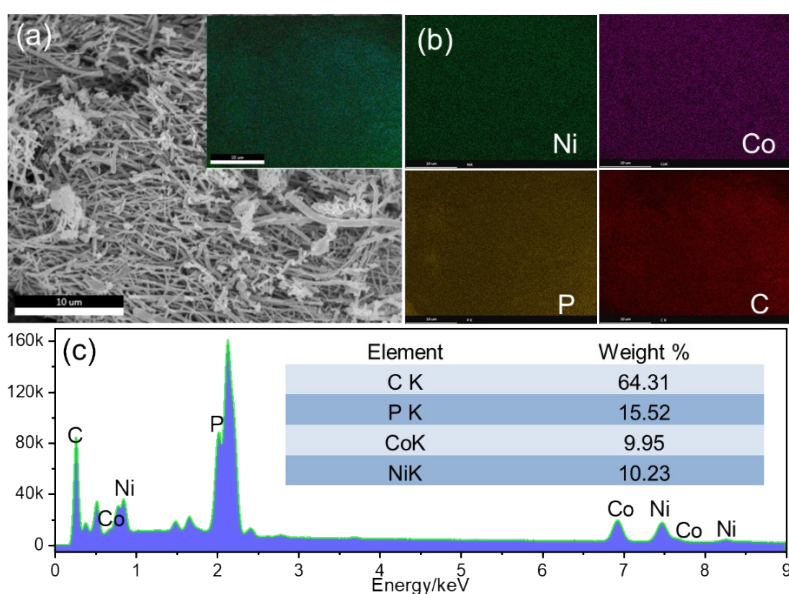

**Figure S2.** Morphology characterization of  $\text{NiCoP}/\text{CNFs}$  sample. (a) SEM images and (b) the corresponding element mapping of Ni, Co, P and C. (c) The EDX of  $\text{NiCoP}/\text{CNFs}$  sample.

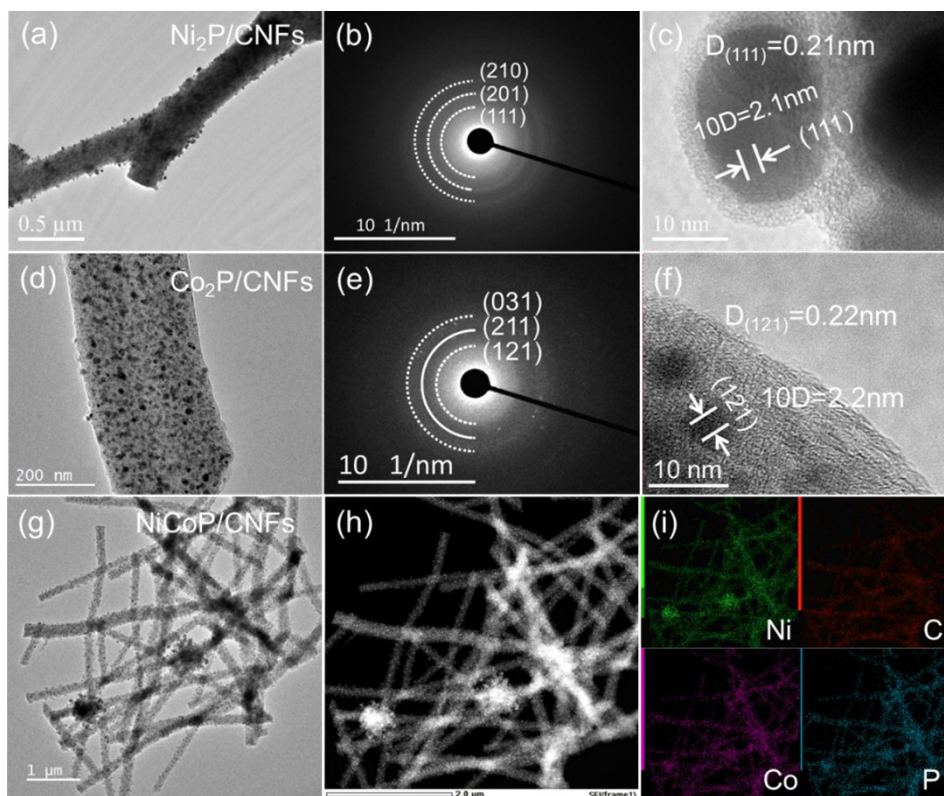

**Figure S3.** The TEM images, SAED pattern, and HRTEM images of (a-c) Ni<sub>2</sub>P/CNFs, (d-f) Co<sub>2</sub>P/CNFs, and the elemental mappings images of (g-i) NiCoP/CNFs sample.

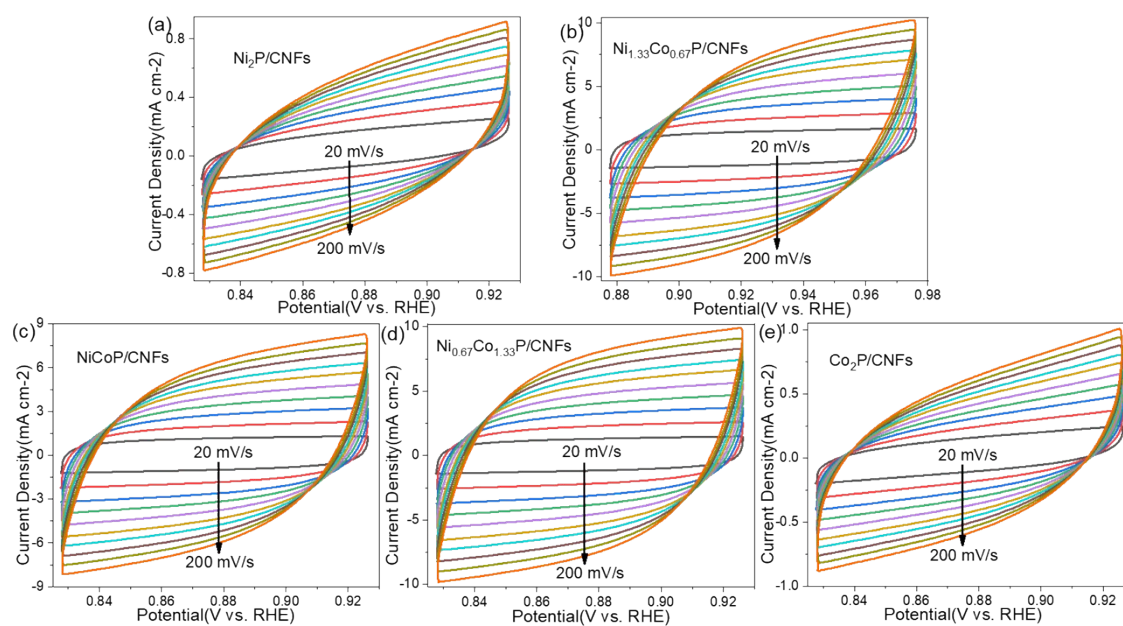

**Figure S4.** CV curves with different scan rates of the (a) Ni<sub>2</sub>P/CNFs, (b) Ni<sub>1.33</sub>Co<sub>0.67</sub>P/CNFs (c) NiCoP/CNFs (d) Ni<sub>0.67</sub>Co<sub>1.33</sub>P/CNFs and (e) Co<sub>2</sub>P/CNFs electrode for HER.

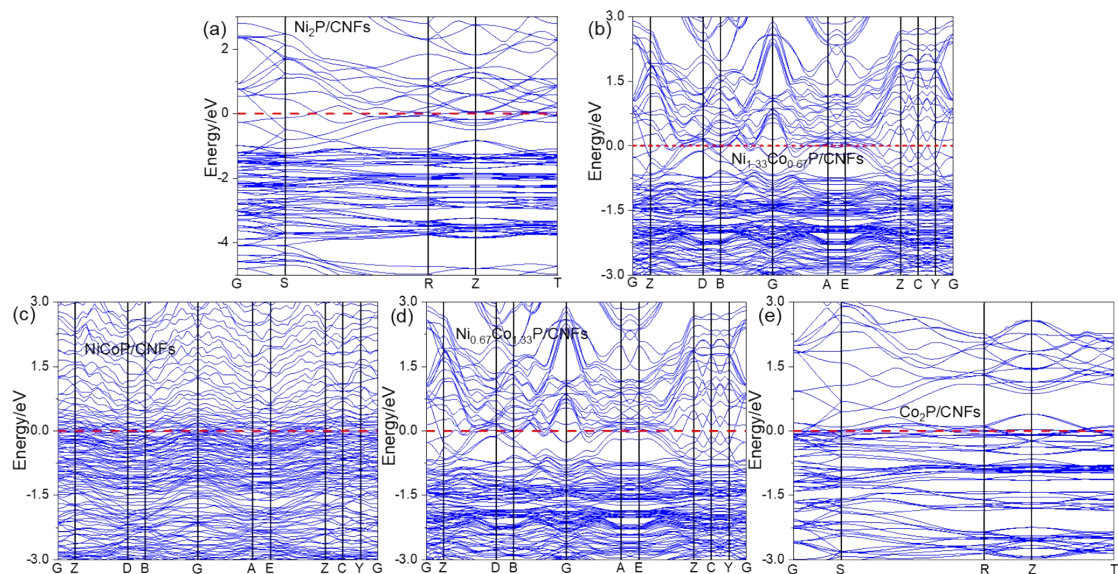

**Figure S5.** Energy-band structures of the (a) Ni<sub>2</sub>P/CNFs, (b) Ni<sub>1.33</sub>Co<sub>0.67</sub>P/CNFs (c) NiCoP/CNFs (d) Ni<sub>0.67</sub>Co<sub>1.33</sub>P/CNFs and (e) Co<sub>2</sub>P/CNFs materials.

**Table S1** The HER performance of nanofiber electrocatalysts

| Materials                                    | Electrolyte                          | $\eta_{10}$ [mV] | Tafel slope [mV dec <sup>-1</sup> ] | References |
|----------------------------------------------|--------------------------------------|------------------|-------------------------------------|------------|
| CoS <sub>2</sub> -C@MoS <sub>2</sub> NFs     | 0.5 M H <sub>2</sub> SO <sub>4</sub> | 173              | 61                                  | [1]        |
| NiCo <sub>2</sub> S <sub>4</sub>             | 0.5 M H <sub>2</sub> SO <sub>4</sub> | 214              | 77.6                                | [2]        |
| NiCo <sub>2</sub> S <sub>4</sub> /CNF        | 0.5 M H <sub>2</sub> SO <sub>4</sub> | 266              | 114                                 | [3]        |
| FeCo/Co <sub>2</sub> P@NPCF                  | 1 M KOH                              | 260              | 120                                 | [4]        |
| NiCoP/CNF700                                 | 1 M KOH                              | 225              | 91                                  | [5]        |
| NiCo <sub>2</sub> Se <sub>4</sub>            | 0.5 H <sub>2</sub> SO <sub>4</sub>   | 168              | 49.8                                | [2]        |
| Ni/Mo <sub>2</sub> C-NCNFs                   | 1 M KOH                              | 143              | 57.8                                | [6]        |
| Co/CoP@NC                                    | 1 M KOH                              | 180              | 77.8                                | [7]        |
| Ni <sub>0.67</sub> Co <sub>1.33</sub> P/CNFs | 1 M KOH                              | 118.76           | 78.2                                | This work  |

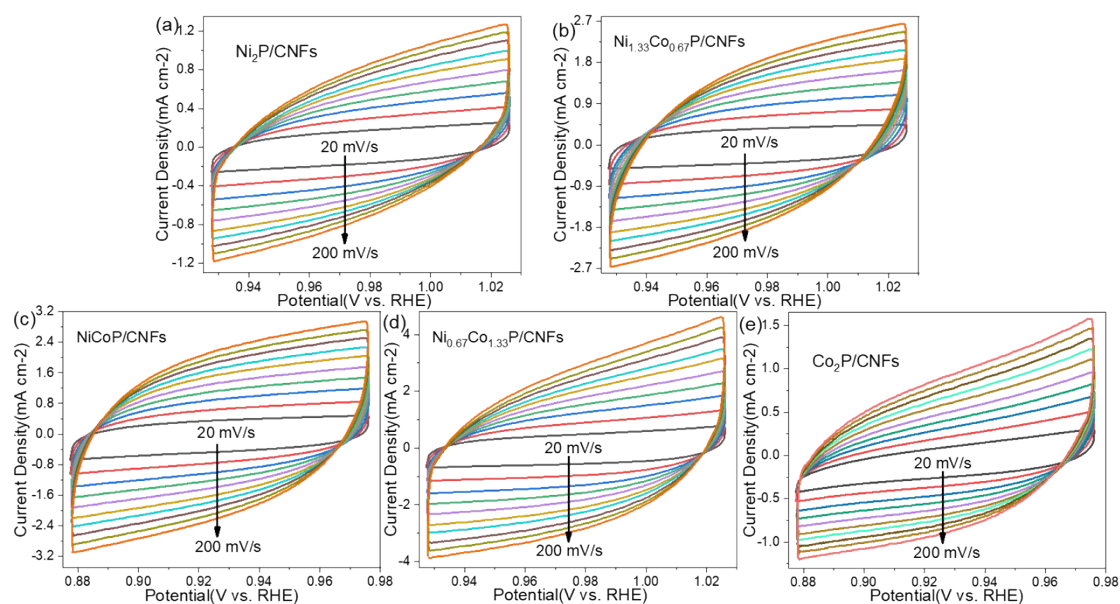

**Figure S6.** CV curves with different scan rates of the (a) Ni<sub>2</sub>P/CNFs, (b) Ni<sub>1.33</sub>Co<sub>0.67</sub>P/CNFs (c) NiCoP/CNFs (d) Ni<sub>0.67</sub>Co<sub>1.33</sub>P/CNFs and (e) Co<sub>2</sub>P/CNFs electrode for OER.

**Table S2** The OER performance of nanofiber electrocatalysts

| Materials                                    | Electrolyte | $\eta_{10}$ (mV) | Tafel slope (mV dec <sup>-1</sup> ) | References |
|----------------------------------------------|-------------|------------------|-------------------------------------|------------|
| Co/N-CF                                      | 1 M KOH     | 380              | 92                                  | [8]        |
| CoNCNTF/CNFs                                 | 0.1 M KOH   | 380              | 66.8                                | [9]        |
| Co/NCFs                                      | 1 M KOH     | 410              | 106.1                               | [10]       |
| NiCo@N-C                                     | 0.1 M KOH   | 530              | 98                                  | [11]       |
| CoNi/BCF                                     | 0.1 M KOH   | 370              | 166                                 | [12]       |
| FeCo-NSCNF@NCNT                              | 0.1 M KOH   | 360              | 49.5                                | [13]       |
| CoNC-CNF-1000                                | 0.1 M KOH   | 450              | 94                                  | [14]       |
| Co@N-CNFs                                    | 1 M KOH     | 436              | 105                                 | [15]       |
| CuCo <sub>2</sub> S <sub>4</sub> NSs@N-CNFs  | 0.1 M KOH   | 315              | 48                                  | [16]       |
| CoFe <sub>2</sub> O <sub>4</sub> @NFs        | 1 M KOH     | 340              | 107                                 | [17]       |
| Ni <sub>0.67</sub> Co <sub>1.33</sub> P/CNFs | 1 M KOH     | 271              | 52.9                                | This work  |

**Table S3** The water splitting performance of nanofiber electrocatalysts

| Materials                                      | voltage | References |
|------------------------------------------------|---------|------------|
| Ni <sub>1.5</sub> Co <sub>0.5</sub> @N-CNT/NFs | 1.57V   | [15]       |
| FeCo@NC-12                                     | 1.71V   | [18]       |
| FeCo/Co <sub>2</sub> P@NPCF                    | 1.75V   | [4]        |
| Co-NiB@NF                                      | 1.72V   | [19]       |
| This work                                      | 1.53V   |            |

## References

1. Y. Zhu, L.F. Song, N. Song, M.X. Li, C. Wang, X.F. Lu, ACS Sustain Chem Eng. 7 (2019) 2899-2905.
2. W. Zong, R.Q. Lian, G.J. He, H.L. Guo, Y. Ouyang, J. Wang, F.L. Lai, Y. Miao, D.W. Rao, T.X. Liu, Electrochim Acta. 333 (2019) 135515.
3. J.C. Xu, J.Q. Rong, F.X. Qiu, Y.M. Zhu, K.F. Mao, Y.Y. Fang, D.Y. Yang, T. Zhang, ColloidInterface Sci. 555 (2019) 294.

4. Q. Shi, Q. Liu, Y. Ma, Z. Fang, Z. Liang, G. Shao, B. Tang, W.Y. Yang, L. Qin, X. Fang, *Adv Energy Mater.* 10 (2020) 1903854(1-11).
5. S. Surendran, S. Shanmugapriya, A. Sivanantham, S. Shanmugam, R.K. Selvan, *Adv Energy Mater.* 8 (2018) 1800553(1-18).
6. M. X. Li, Y. Zhu, H. Y. Wang, C. Wang, N. Pinna, X. F. Lu, *Adv Energy Mater.* 9 (2019) 1803185(1-11).
7. Y. Li, H.X. Li, K.Z. Cao, T. Jin, X.J. Wang, H.M. Sun, J.X. Ning, Y.J. Wang, L.F. Jiao, *Energy Storage Mater.* 12 (2018) 44-53.
8. P.P. Sun, D. Zhang, M. He, Z. Zuo, N. Huang, X. Lv, Y.H. Sun, X.H. Sun, *Electrochim Acta.* 337 (2020) 135848.
9. D.X. Ji, L. Fan, L.L. Li, N. Mao, X.H. Qin, S.J. Peng, S. Ramakrishna, *Carbon.* 142 (2018) 379-387.
10. H.Z. Li, M.Q. An, Y.W. Zhao, S. Pi, C.J. Li, W. Sun, H.G. Wang, *Appl Surf Sci.* 478 (2019) 560-566.
11. Y. Fu, H.Y. Yu, C. Jiang, T.H. Zhang, R. Zhan, X.W. Li, J. F. Li, J.H. Tian, R.Z. Yang, *Adv Funct Mater.* 28 (2018) 129-138.
12. W.J. Wan, X.J. Liu, H.Y. Li, X.Y. Peng, D.S. Xi, J. Luo, *Appl Catal B.* 240 (2019) 193-200.
13. K. Fu, Y. Wang, L.C. Mao, X.X. Yang, W. Peng, J.H. Jin, S.L. Yang, G. Li, *J Power Sourc.* 421 (2019) 68-75.
14. W.M. Zhang, X.Y. Yao, S.N. Zhou, X.W. Li, L. Li, Z. Yu, L. Gu, *Small.* 14 (2018) 1800423(1-8).
15. T.F. Li, S.L. Li, Q.Y. Liu, J.W. Yin, D.M. Sun, M.Y. Zhang, L. Xu, Y.W. Tang, Y.W. Zhang, *Adv Sci.* 7 (2019) 1902371(1-9).
16. Z.H. Pan, H. Chen, J. Yang, Y.Y. Ma, Q.C. Zhang, Z.K. Kou, X.Y. Ding, Y.J. Pang, L. Zhang, Q.L. Gu, C.L. Yan, J. Wang, *Adv Sci.* 6 (2019) 1900628(1-10).
17. Z.M. Zhang, J.Y. Zhang, T. Wang, Z.W. Li, G.J. Yang, H.Q. Bian, J.Y. Li, D.Q. Gao, *RSC Adv.* 8 (2018) 5338-5343.
18. F. Aftab, H. Duran, K. Kirchhoff, M. Zaheer, B. Iqbal, M. Saleem, S.N. Arshad, *Chem Cat Chem.* 12 (2019) 932-943.
19. Z.Y. Wu, W.B. Ji, B.C. Hu, H.W. Liang, X.X. Xu, Z.L. Yu, B.Y. Li, S.H. Yu, *Nano Energy.* 51 (2018) 286-293.
